# Supplementary material
Source: Springer Nature journal article supplement (https://www.springermedizin.de/resource/supplementary/12981_2012_234_MOESM1_ESM.pdf/9604112)

### HCV Ab-negative patients

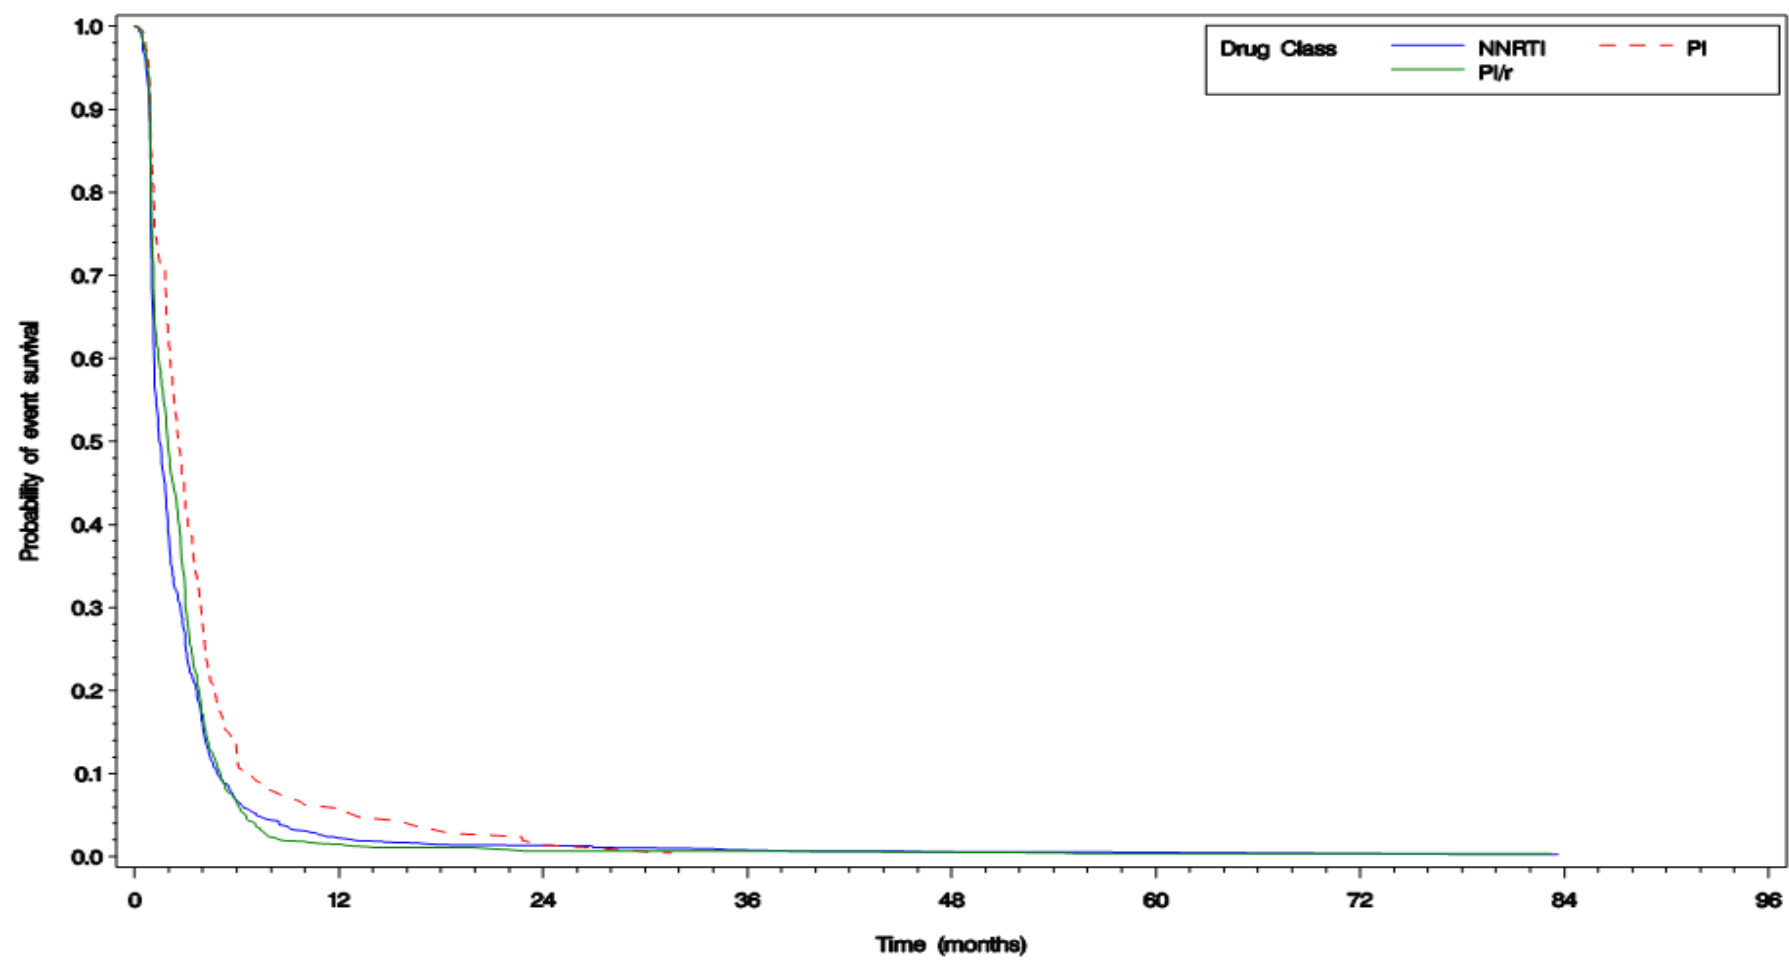

### HCV Ab-positive patients

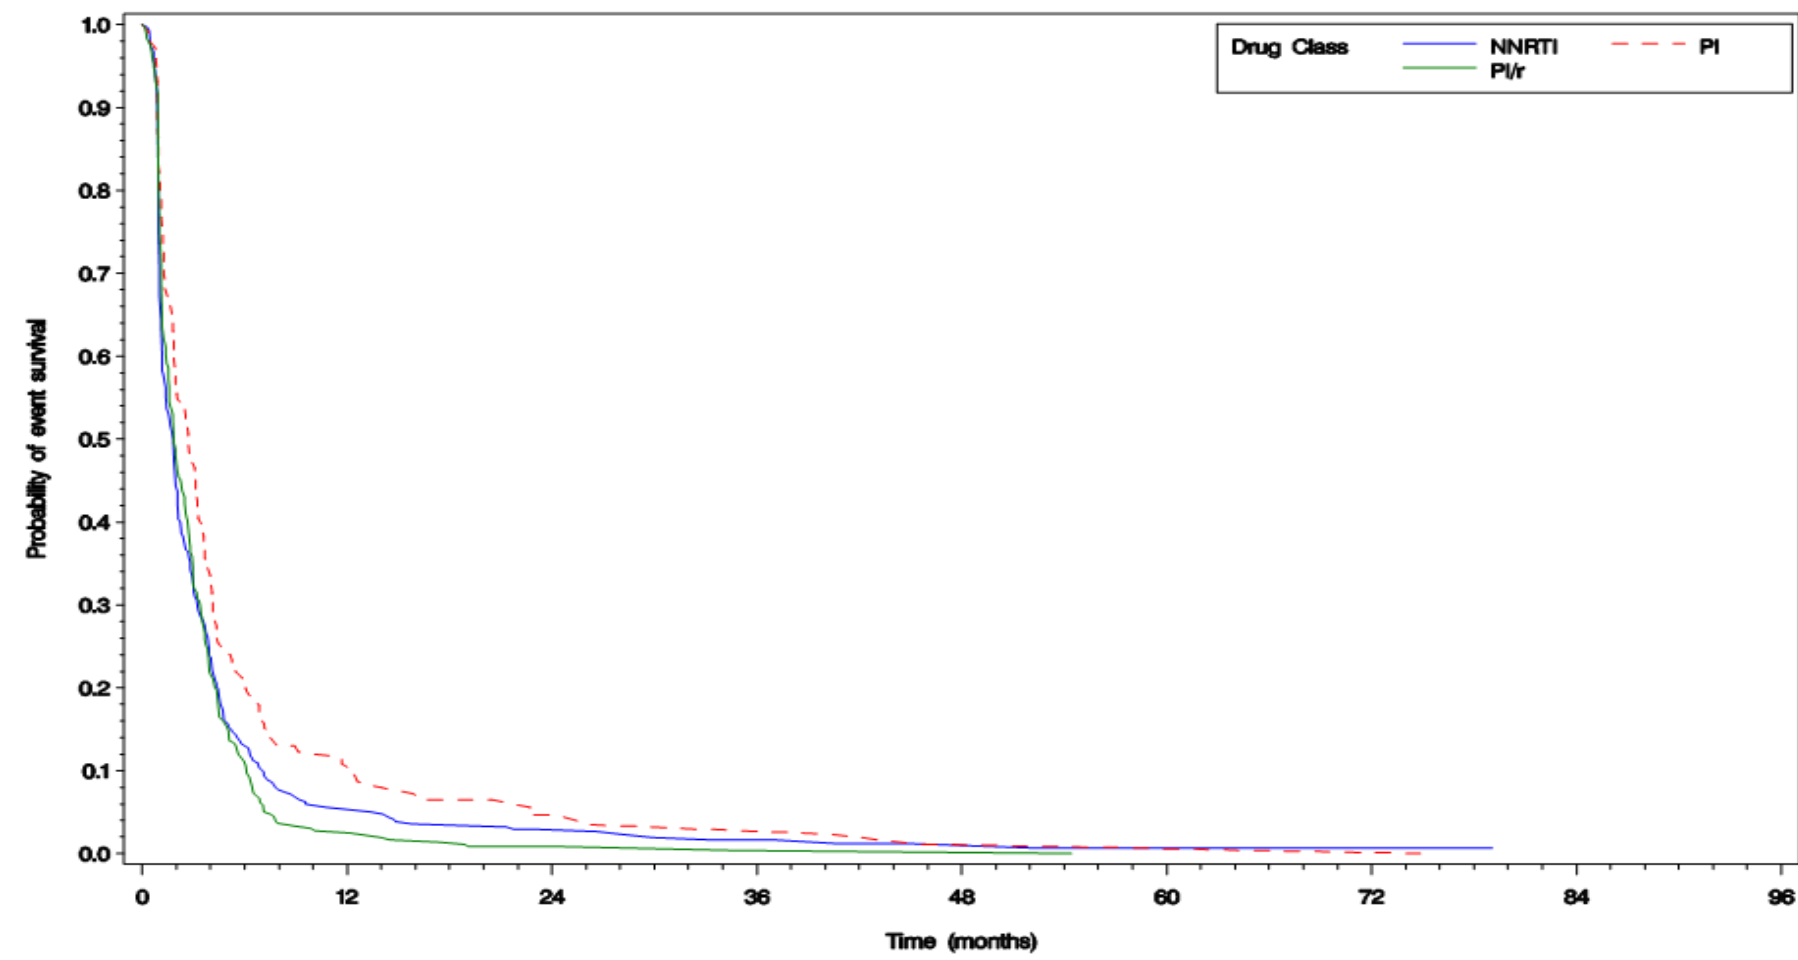

Supplement: MOESM1 [file 9604112]
